# Supplementary material
Source: PubMed Central journal article supplement (PMC3795179)
Supplement: tables2.pdf [file tables2.pdf]

Table S2: Complete characterization of 102 Argentinean hexaploide wheat cultivars based on 3 biochemical and 17 functional molecular markers

| N  | Cultivar       | Company | Biochemical Markers |        |        | Closely Likage to genes Markers |       |       |        | Functional Markers |        |        |        |        |        |         |        |       |       |        |        |        |
|----|----------------|---------|---------------------|--------|--------|---------------------------------|-------|-------|--------|--------------------|--------|--------|--------|--------|--------|---------|--------|-------|-------|--------|--------|--------|
|    |                |         | Glu-A1              | Glu-B1 | Glu-D1 | Lr34                            | Lr 24 | Lr 10 | Ppd-B1 | Vrn-A1             | Vrn-B1 | Vrn-D1 | Ppd-D1 | Rht-B1 | Rht-D1 | PinA-D1 | Glu-A3 | Wx-A1 | Wx-B1 | Vp1-B3 | Ppo-D1 | Ppo-A1 |
| 1  | ACA 201        | ACA     | 2*                  | 17+18  | 5+10   | 229                             | Null  | 282   | s      | s                  | s      | s      | s      | a      | b      | a       | f      | a     | a     | d      | a      | a      |
| 2  | ACA 202        | ACA     | 2*                  | 7+9    | 5+10   | 229                             | Null  | Null  | s      | s                  | s      | w      | s      | a      | b      | a       | e      | g     | a     | d      | a      | a      |
| 3  | ACA 223        | ACA     | 1                   | 7+9    | 5+10   | 150                             | Null  | 282   | s      | s                  | s      | w      | s      | b      | a      | a       | c      | a     | a     | d      | b      | a      |
| 4  | ACA 320        | ACA     | 2*                  | 7oe+8* | 5+10   | 229                             | Null  | 282   | s      | w                  | s      | s      | s      | a      | a      | a       | f      | a     | b     | d      | a      | a      |
| 5  | ACA 801        | ACA     | 2*                  | 7+9    | 5+10   | 150                             | Null  | Null  | s      | w                  | s      | w      | i      | b      | a      | a       | c      | a     | a     | d      | a      | a      |
| 6  | ACA 901        | ACA     | 2*                  | 7+9    | 5+10   | 229                             | Null  | Null  | s      | w                  | s      | s      | i      | b      | a      | b       | c      | g     | a     | d      | a      | a      |
| 7  | ACA 903B       | ACA     | 2*                  | 7+9    | 5+10   | 229                             | Null  | Null  | i      | s                  | s      | w      | i      | a      | b      | b       | g      | a     | a     | d      | a      | b      |
| 8  | ACA 906        | ACA     | 1                   | 7+9    | 5+10   | 150                             | Null  | Null  | s      | w                  | w      | s      | i      | b      | a      | b       | f      | a     | a     | c      | b      | a      |
| 9  | ACA 907        | ACA     | 2*                  | 7+8    | 5+10   | 229                             | Null  | 362   | s      | s                  | s      | s      | i      | b      | a      | b       | f      | a     | a     | c      | b      | a      |
| 10 | Baguette 10    | Nidera  | null                | 6+8    | 5+10   | 229                             | Null  | 362   | s      | s*                 | w      | w      | i      | a      | a      | a       | f      | a     | a     | c      | b      | b      |
| 11 | Baguette 17    | Nidera  | null                | 7+9    | 5+10   | 229                             | Null  | Null  | s      | s                  | w      | w      | i      | a      | a      | a       | b      | a     | a     | a      | b      | b      |
| 12 | Baguette 18    | Nidera  | null                | 13+16  | 5+10   | 229                             | Null  | Null  | s      | s*                 | s      | w      | i      | a      | a      | a       | f      | a     | a     | b      | b      | b      |
| 13 | Baguette 19    | Nidera  | null                | 7+8    | 5+10   | 229                             | Null  | Null  | s      | s*                 | w      | w      | i      | a      | b      | a       | d      | a     | a     | b      | b      | a      |
| 14 | Baguette 21    | Nidera  | null                | 7+8    | 2+12   | 229                             | Null  | Null  | s      | w                  | w      | w      | i      | a      | b      | a       | d      | a     | a     | b      | b      | b      |
| 15 | Baguette 30    | Nidera  | null                | 7oe+8* | 2+12   | 229                             | Null  | Null  | s      | s                  | s      | w      | s      | b      | a      | a       | c      | a     | a     | b      | b      | b      |
| 16 | Baguette 31    | Nidera  | 2*                  | 7      | 5+10   | 229                             | Null  | Null  | s      | w                  | w      | w      | s      | a      | b      | a       | e      | a     | a     | b      | b      | b      |
| 17 | Baguette 9     | Nidera  | 2*                  | 6+8    | 5+10   | 229                             | Null  | 282   | s      | s*                 | w      | w      | i      | a      | a      | a       | d      | a     | a     | b      | b      | b      |
| 18 | Baguette P. 11 | Nidera  | 2*                  | 7+8    | 5+10   | 229                             | Null  | 282   | s      | s*                 | w      | w      | i      | a      | a      | a       | d      | a     | a     | b      | b      | b      |
| 19 | Barletta 77    | ¿?      | 2*                  | 7+8    | 5+10   | 229                             | Null  | Null  | s      | s                  | s      | w      | s      | a      | a      | a       | b      | a     | a     | d      | a      | a      |
| 20 | BIOINTA 1000   | INTA    | 1                   | 7oe+8* | 5+10   | 229                             | Null  | 282   | i      | w                  | s      | w      | i      | a      | b      | b       | c      | a     | a     | d      | b      | a      |
| 21 | BIOINTA 1001   | INTA    | 1                   | 7+9    | 5+10   | 229                             | Null  | 282   | s      | w                  | s      | s      | i      | a      | a      | a       | b      | a     | b     | a      | a      | a      |
| 22 | BIOINTA 1002   | INTA    | 1                   | 7+9    | 5+10   | 229                             | Null  | Null  | i      | w                  | w      | s      | s      | a      | b      | b       | d      | a     | a     | c      | a      | a      |
| 23 | BIOINTA 1003   | INTA    | 2*                  | 7+9    | 5+10   | 150                             | 350   | Null  | s      | s                  | w      | w      | i      | b      | a      | b       | b      | a     | a     | c      | b      | a      |
| 24 | BIOINTA 1004   | INTA    | 2*                  | 7+8    | 5+10   | 229                             | 350   | 282   | i      | s                  | w      | w      | s      | b      | a      | a       | c      | a     | a     | c      | b      | a      |
| 25 | BIOINTA 1005   | INTA    | 2*                  | 7+9    | 5+10   | 229                             | Null  | Null  | s      | w                  | s      | s      | i      | b      | a      | b       | c      | a     | a     | c      | a      | a      |
| 26 | BIOINTA 1006   | INTA    | 1                   | 7+9    | 5+10   | 229                             | Null  | Null  | s      | w                  | s      | s      | i      | b      | a      | b       | g      | a     | b     | c      | a      | a      |
| 27 | BIOINTA 2001   | INTA    | 2*                  | 7+8    | 5+10   | 229                             | Null  | 282   | s      | w                  | s      | s      | -9     | a      | b      | a       | f      | a     | -9    | c      | b      | a      |
| 28 | BIOINTA 2004   | INTA    | 2*                  | 7+8    | 5+10   | 150                             | Null  | Null  | i      | w                  | w      | w      | s      | b      | a      | a       | h      | a     | b     | b      | a      | a      |
| 29 | BIOINTA 3003   | INTA    | 2*                  | 7+9    | 5+10   | 229                             | Null  | Null  | i      | w                  | w      | w      | s      | b      | a      | a       | h      | a     | a     | c      | a      | a      |
| 30 | BIOINTA 3004   | INTA    | 2*                  | 7+9    | 5+10   | 229                             | Null  | 282   | s      | s                  | s      | s      | s      | b      | a      | b       | c      | a     | a     | c      | b      | a      |

|    |                     |           |      |        |      |     |      |      |   |    |   |   |    |   |   |   |   |   |    |    |    |   |
|----|---------------------|-----------|------|--------|------|-----|------|------|---|----|---|---|----|---|---|---|---|---|----|----|----|---|
| 31 | BIOINTA 3005        | INTA      | 2*   | 7+8    | 4+12 | 229 | Null | 282  | i | w  | w | w | s  | a | b | b | f | a | a  | d  | a  | b |
| 32 | SY100               | Syngenta  | 2*   | 6+8    | 5+10 | 150 | Null | Null | i | w  | s | s | s  | a | b | a | d | a | b  | d  | b  | b |
| 33 | SY200               | Syngenta  | 2*   | 6+8    | 5+10 | 229 | Null | 362  | s | w  | w | s | i  | a | a | a | g | a | a  | d  | b  | b |
| 34 | SY300               | Syngenta  | 2*   | 6+8    | 5+10 | 229 | Null | 362  | s | s* | w | w | i  | a | a | a | f | a | a  | -9 | b  | b |
| 35 | Buck 55CL           | Buck      | 2*   | 7+9    | 5+10 | 229 | Null | Null | i | s  | s | w | s  | a | a | b | f | a | a  | d  | a  | a |
| 36 | Buck 75 Aniversario | Buck      | 1    | 7+8    | 5+10 | 229 | Null | Null | s | s  | w | w | i  | a | b | a | c | a | b  | d  | b  | a |
| 37 | Buck AGP Fast       | Buck      | null | 13+16  | 5+10 | 229 | Null | 282  | s | s  | w | w | s  | b | a | b | f | a | a  | b  | a  | a |
| 38 | Buck Baqueano       | Buck      | 1    | 7+9    | 5+10 | 229 | Null | 282  | s | w  | w | s | s  | a | b | a | c | a | a  | d  | -9 | a |
| 39 | Buck Biguá          | Buck      | 1    | 7oe+8* | 5+10 | 229 | Null | Null | i | s  | w | w | s  | a | b | a | d | g | a  | d  | -9 | a |
| 40 | Buck Brasil         | Buck      | 1    | 7+8    | 5+10 | 150 | Null | 282  | s | s  | s | w | -9 | a | b | b | f | a | a  | c  | b  | a |
| 41 | Buck Chacarero      | Buck      | 2*   | 17+18  | 5+10 | 229 | Null | -9   | i | s  | s | s | s  | a | b | a | f | a | a  | d  | b  | a |
| 42 | Buck Guapo          | Buck      | 1    | 7oe+8* | 5+10 | 229 | Null | Null | s | w  | s | w | s  | a | b | a | e | a | a  | d  | b  | a |
| 43 | Buck Huanchen       | Buck      | 2*   | 7+9    | 5+10 | 150 | Null | 282  | s | w  | w | s | i  | b | a | b | c | a | a  | d  | a  | a |
| 44 | Buck Malevo         | Buck      | 2*   | 7oe+8* | 5+10 | 229 | 350  | 282  | s | w  | s | w | s  | a | b | b | f | a | a  | d  | b  | a |
| 45 | Buck Mangrullo      | Buck      | 1    | 17+18  | 5+10 | 229 | Null | Null | s | w  | s | w | s  | a | b | a | f | a | e  | d  | b  | a |
| 46 | Buck Meteoro        | Buck      | 1    | 7oe+8* | 5+10 | 229 | Null | 282  | s | s  | s | w | s  | a | b | a | f | a | a  | c  | b  | a |
| 47 | Buck Napostá        | Buck      | 1    | 7      | 2+12 | 229 | Null | 362  | s | s  | s | w | s  | a | a | a | c | a | -9 | b  | b  | a |
| 48 | Buck Norteño        | Buck      | 2*   | 7oe+8* | 5+10 | 229 | Null | 282  | s | w  | s | w | s  | a | a | a | f | a | a  | c  | b  | a |
| 49 | Buck Pingo          | Buck      | 1    | 17+18  | 5+10 | 229 | Null | 282  | s | s  | w | s | s  | a | b | b | f | a | e  | d  | b  | a |
| 50 | Buck Pronto         | Buck      | 2*   | 7oe+8* | 5+10 | 229 | Null | Null | i | s  | w | w | s  | a | b | b | d | a | a  | c  | b  | a |
| 51 | Buck Puelche        | Buck      | 1    | 7+9    | 5+10 | 229 | 350  | 282  | s | s  | w | w | i  | b | a | b | f | a | b  | c  | a  | a |
| 52 | Buck Ranquel        | Buck      | 2*   | 7+9    | 5+10 | 229 | Null | 282  | i | w  | w | w | i  | a | b | a | c | a | a  | c  | a  | a |
| 53 | Buck Taita          | Buck      | 2*   | 17+18  | 5+10 | 229 | Null | Null | s | s  | w | w | i  | a | b | b | f | a | a  | c  | b  | a |
| 54 | Don Mario Arex      | Don Mario | null | 7+9    | 5+10 | 229 | Null | 282  | i | w  | s | s | i  | a | a | b | c | a | a  | c  | b  | a |
| 55 | Don Mario Atlax     | Don Mario | 1    | 7+9    | 5+10 | 229 | Null | Null | i | w  | s | s | i  | b | a | b | c | a | a  | c  | b  | a |
| 56 | Don Mario Cronox    | Don Mario | 2*   | 7+9    | 5+10 | 229 | 350  | 282  | i | w  | s | s | i  | b | a | b | g | a | a  | c  | b  | a |
| 57 | Don Mario Onix      | Don Mario | 2*   | 7+9    | 5+10 | 229 | Null | 282  | i | w  | s | s | s  | a | a | b | c | a | a  | c  | b  | a |
| 58 | Don Mario Themix    | Don Mario | 2*   | 7+9    | 5+10 | 229 | Null | 282  | i | w  | w | w | s  | b | b | a | f | a | a  | b  | a  | a |
| 59 | INIA Centinela      | INIA      | 2*   | 7+9    | 5+10 | 229 | Null | Null | s | s  | s | s | i  | b | a | b | c | g | a  | c  | a  | b |
| 60 | INIA Churrinche     | INIA      | 2*   | 7+8    | 5+10 | 229 | 350  | 282  | i | s  | w | w | s  | b | a | a | a | a | a  | c  | b  | a |
| 61 | INIA Cóndor         | INIA      | 2*   | 7+8    | 5+10 | 150 | Null | Null | s | s  | w | w | i  | a | b | a | b | a | a  | c  | a  | a |
| 62 | INIA Torcaza        | INIA      | 2*   | 17+18  | 5+10 | 229 | 350  | 282  | s | w  | s | w | s  | b | a | b | f | a | a  | c  | b  | a |
| 63 | Klein 32            | Klein     | null | 7+8    | 2+12 | 229 | Null | Null | s | w  | w | w | i  | a | a | a | c | a | e  | a  | b  | a |
| 64 | Klein Atlas         | Klein     | 1    | 7oe+8* | 2+12 | 229 | Null | Null | s | s* | w | w | i  | a | a | a | e | a | e  | a  | b  | b |

|    |                    |        |    |       |      |     |      |      |   |    |   |   |   |   |   |   |   |   |    |   |    |    |
|----|--------------------|--------|----|-------|------|-----|------|------|---|----|---|---|---|---|---|---|---|---|----|---|----|----|
| 65 | Klein Brujo        | Klein  | 1  | 7+9   | 5+10 | 229 | Null | Null | s | w  | w | s | i | a | a | b | c | a | a  | c | b  | b  |
| 66 | Klein Cacique      | Klein  | 2* | 7+8   | 5+10 | 229 | Null | Null | s | w  | s | s | s | b | a | b | c | a | a  | d | b  | a  |
| 67 | Klein Capricornio  | Klein  | 2* | 7+8   | 5+10 | 150 | Null | Null | s | w  | w | s | s | a | a | b | f | a | b  | d | b  | a  |
| 68 | Klein Carpincho    | Klein  | 1  | 7+9   | 5+10 | 150 | Null | 282  | s | w  | s | s | s | b | a | b | b | a | a  | d | b  | a  |
| 69 | Klein Castor       | Klein  | 1  | 17+18 | 5+10 | 229 | Null | Null | s | w  | s | s | i | b | a | b | c | a | a  | b | a  | a  |
| 70 | Klein Centauro     | Klein  | 1  | 7+8   | 5+10 | 229 | Null | Null | s | s* | w | w | i | a | a | a | d | a | a  | d | b  | b  |
| 71 | Klein Chajá        | Klein  | 2* | 17+18 | 5+10 | 229 | Null | Null | s | s  | w | w | i | a | b | a | c | a | b  | d | b  | a  |
| 72 | Klein Don Enrique  | Klein  | 2* | 17+18 | 5+10 | 229 | Null | 282  | s | w  | s | w | i | b | a | a | a | a | a  | d | b  | b  |
| 73 | Klein Escorpión    | Klein  | 1  | 7+9   | 5+10 | 150 | Null | 282  | s | w  | s | s | i | a | a | b | a | a | b  | d | b  | a  |
| 74 | Klein Gavilán      | Klein  | 2* | 7+9   | 5+10 | 229 | 350  | 282  | s | s  | s | s | s | b | a | b | b | a | a  | d | a  | a  |
| 75 | Klein Gladiador    | Klein  | 1  | 7+9   | 5+10 | 229 | Null | 282  | s | w  | w | s | i | b | a | b | f | a | a  | b | a  | a  |
| 76 | Klein Guerrero     | Klein  | 1  | 7+9   | 5+10 | 150 | Null | 282  | s | w  | s | s | i | b | a | b | c | a | a  | d | b  | a  |
| 77 | Klein Impacto      | Klein  | 2* | 7+9   | 5+10 | 229 | Null | 362  | s | w  | s | w | s | a | a | a | b | a | a  | d | b  | a  |
| 78 | Klein León         | Klein  | 2* | 7+9   | 2+12 | 229 | Null | Null | s | w  | s | w | i | b | a | b | d | a | a  | d | b  | b  |
| 79 | Klein Nutria       | Klein  | 2* | 7+9   | 5+10 | 150 | Null | Null | s | w  | s | w | i | a | a | a | e | a | a  | d | b  | a  |
| 80 | Klein Pantera      | Klein  | 2* | 7+9   | 5+10 | 229 | Null | 362  | s | w  | w | s | s | a | a | b | d | a | a  | c | b  | b  |
| 81 | Klein Proteo       | Klein  | 1  | 7+9   | 5+10 | 229 | Null | 282  | s | w  | s | s | s | a | a | a | g | a | a  | a | b  | a  |
| 82 | Klein Rayo         | Klein  | 2* | 7+9   | 5+10 | 229 | Null | Null | s | w  | s | s | i | b | a | b | b | a | a  | d | a  | a  |
| 83 | Klein Rendidor     | Klein  | 2* | 7+9   | 5+10 | 229 | Null | 362  | i | w  | s | w | s | a | a | a | f | a | -9 | b | -9 | -9 |
| 84 | Klein Tauro        | Klein  | 1  | 7+8   | 5+10 | 229 | Null | Null | s | w  | s | s | i | a | a | b | c | a | a  | d | b  | a  |
| 85 | Klein Tigre        | Klein  | 1  | 7+9   | 5+10 | 150 | Null | 282  | s | w  | s | s | i | b | a | b | b | a | a  | d | b  | a  |
| 86 | Klein Yará         | Klein  | 2* | 7+9   | 5+10 | 229 | Null | Null | s | w  | s | s | s | b | a | a | f | a | a  | b | b  | a  |
| 87 | Klein Zorro        | Klein  | 2* | 7+9   | 5+10 | 229 | Null | Null | s | w  | w | s | i | a | a | b | c | a | a  | d | b  | a  |
| 88 | LE 2330            | INIA   | 1  | 7+9   | 5+10 | 150 | Null | Null | s | s  | w | s | s | b | a | a | b | a | a  | d | b  | a  |
| 89 | LE 2331            | INIA   | 1  | 17+18 | 5+10 | 229 | Null | Null | s | w  | s | w | i | b | a | a | f | a | a  | d | -9 | a  |
| 90 | LE 2333            | INIA   | 2* | 7+9   | 5+10 | 229 | Null | Null | i | w  | w | s | i | b | a | b | b | a | a  | d | b  | a  |
| 91 | LE 2341            | INIA   | 2* | 7+9   | 5+10 | 229 | Null | 362  | s | w  | w | w | i | a | a | b | f | a | a  | c | b  | a  |
| 92 | Marcos Juárez INTA | INTA   | 2* | 7+9   | 2+12 | 150 | Null | Null | i | w  | w | w | i | a | b | a | d | g | a  | c | b  | a  |
| 93 | Olaeta Artillero   | Olaeta | 2* | 7+9   | 5+10 | 229 | Null | 282  | s | w  | s | w | s | a | a | a | f | a | a  | b | a  | a  |
| 94 | ProINTA Elite      | INTA   | 2* | 7+9   | 5+10 | 229 | Null | Null | s | s  | w | w | i | a | b | b | c | a | a  | d | a  | b  |
| 95 | ProINTA Gaucho     | INTA   | 2* | 13+16 | 2+12 | 229 | Null | 282  | i | w  | s | s | i | a | b | b | c | a | a  | d | a  | a  |
| 96 | ProINTA Granar     | INTA   | 2* | 13+16 | 5+10 | 150 | Null | Null | s | s  | s | w | i | a | a | a | c | a | a  | d | a  | a  |
| 97 | ProINTA Guazú      | INTA   | 1  | 7+9   | 5+10 | 150 | Null | Null | s | w  | w | s | s | b | a | b | c | a | a  | d | b  | a  |
| 98 | ProINTA Isla Verde | INTA   | 1  | 13+16 | 5+10 | 150 | Null | 282  | s | s  | w | w | i | a | a | b | c | a | a  | c | a  | a  |

|     |               |        |    |     |      |     |      |      |   |    |   |   |   |   |   |   |   |   |   |   |    |   |
|-----|---------------|--------|----|-----|------|-----|------|------|---|----|---|---|---|---|---|---|---|---|---|---|----|---|
| 99  | ProINTA Oasis | INTA   | 1  | 7+9 | 5+10 | 229 | Null | 282  | s | w  | s | w | i | a | a | a | b | a | a | d | b  | a |
| 100 | Sirirí        | INIA   | 2* | 7+9 | 5+10 | 229 | Null | Null | s | s  | s | s | i | b | a | a | c | a | a | a | b  | b |
| 101 | Sinvalocho    | MA     | -9 | 7+8 | 5+10 | 229 | Null | 362  | s | s* | s | w | s | a | a | a | e | a | a | a | -9 | a |
| 102 | SRN Nogal     | Sursem | 2* | 7+8 | 5+10 | 229 | Null | Null | s | w  | w | w | i | a | a | a | g | a | a | d | b  | b |

| Molecular Markers | References                                                                                                                                                                                                                                                                         |
|-------------------|------------------------------------------------------------------------------------------------------------------------------------------------------------------------------------------------------------------------------------------------------------------------------------|
| <i>Glu-A1:</i>    |                                                                                                                                                                                                                                                                                    |
| <i>Glu-B1:</i>    | HMW-Gs were classified according to their electrophoretic mobility in SDS-PAGE (Pflüger et al. 2001).<br>Glu-B1 7oe+8* allele was differentiate from 7+8 based on Butow et al. (2004) molecular markers                                                                            |
| <i>Glu-D1:</i>    |                                                                                                                                                                                                                                                                                    |
| <i>Lr34</i>       | Alleles scored based on Lagudah et. al (2006); 150 bp allele + for <i>Lr34</i> and 229 bp allele - for <i>Lr34</i>                                                                                                                                                                 |
| <i>Lr 24</i>      | Alleles scored based on Schachermayr et al. (1995); 350 bp allele + for <i>Lr24</i> and Null allele (lack of PCR amplification) - for <i>Lr24</i>                                                                                                                                  |
| <i>Lr 10</i>      | Alleles scored based on Schachermayr et al. (1997); 282 bp allele + for <i>Lr10</i> and 362 bp and Null allele - for <i>Lr10</i>                                                                                                                                                   |
| <i>Ppd-B1</i>     | Alleles scored based on Díaz et al. (2012); i = <i>Ppd-B1</i> Sonora 64 insensitive allele; s = <i>ppd-B1</i> sensitive allele                                                                                                                                                     |
| <i>Vrn-A1</i>     | Alleles scored based on Yan et al. (2004); s = <i>Vrn-A1a</i> spring allele; s* = <i>Vrn-A1b</i> spring allele; w = <i>vrn-A1</i> winter allele                                                                                                                                    |
| <i>Vrn-B1</i>     | Alleles scored based on Fu et al. (2005); s = <i>Vrn-B1</i> spring allele; w = <i>vrn-B1</i> winter allele                                                                                                                                                                         |
| <i>Vrn-D1</i>     | Alleles scored based on Fu et al. (2005); s = <i>Vrn-D1</i> spring allele; w = <i>vrn-D1</i> winter allele                                                                                                                                                                         |
| <i>Ppd-D1</i>     | Alleles scored based on Beales et al. (2007); i = <i>Ppd-D1a</i> insensitive allele; s = <i>Ppd-D1b</i> sensitive allele                                                                                                                                                           |
| <i>Rht-B1</i>     | Alleles scored based on Ellis et al. (2002); a = <i>Rht-B1a</i> tall allele; b = <i>Rht-B1b</i> dwarf allele                                                                                                                                                                       |
| <i>Rht-D1</i>     | Alleles scored based on Ellis et al. (2002); a = <i>Rht-D1a</i> tall allele; b = <i>Rht-D1b</i> dwarf allele                                                                                                                                                                       |
| <i>PinA-D1</i>    | Alleles scored based on Gautier et al. (1994); a = <i>PinA-D1a</i> soft allele; b = <i>PinA-D1b</i> hard allele                                                                                                                                                                    |
| <i>Glu-A3</i>     | Alleles scored based on Zhang et al. (2004); a = <i>Glu-A1a</i> allele; b = <i>Glu-A3b</i> allele; c = <i>Glu-A3c</i> allele; d = <i>Glu-A3d</i> allele;<br>e = <i>Glu-A3e</i> allele; f = <i>Glu-A3f</i> allele; g = <i>Glu-A3g</i> allele; h = Presence of 1AL/1RS translocation |
| <i>Wx-A1</i>      | Alleles scored based on McLauchlan et al. (2001) and Vanzetti et al. (2009); a = <i>Wx-A1a</i> allele; g = <i>Wx-A1g</i> allele                                                                                                                                                    |
| <i>Wx-B1</i>      | Alleles scored based on McLauchlan et al. (2001) and Vanzetti et al. (2009); a = <i>Wx-B1a</i> allele; b = <i>Wx-B1b</i> allele and e = <i>Wx-B1e</i> allele                                                                                                                       |
| <i>Vp1-B3</i>     | Alleles scored based on Yang et al. (2007) a = <i>Vp1-B3a</i> allele; b = <i>Vp1-B3b</i> allele and c = <i>Vp1-B3c</i> allele; d = <i>Vp1-B3d</i> allele                                                                                                                           |
| <i>Ppo-D1</i>     | Alleles scored based on He et al. (2007); a = <i>Ppo-A1a</i> allele; b = <i>Ppo-A1b</i> allele                                                                                                                                                                                     |
| <i>Ppo-A1</i>     | Alleles scored based on He et al. (2007); a = <i>Ppo-D1a</i> allele; b = <i>Ppo-D1b</i> allele                                                                                                                                                                                     |

**Highlighted**

- 9 Missing data
- Rare alleles < 5 cultivars
